# Supplementary material for: Development of Transdermal Oleogel Containing Olmesartan Medoxomil: Statistical Optimization and Pharmacological Evaluation
Source: MDPI journal article supplement (doi:10.3390/pharmaceutics15041083), 2023-03-28
Supplement: s1 [file s1]

Supplementary Figure S1. Effect of interaction between the two studied factors of O/S ratio ( $X_1$ ) and Aerosil % ( $X_2$ ) on Viscosity.

Supplementary Figure S2. Effect of interaction between the two studied factors of O/S ratio ( $X_1$ ) and Aerosil % ( $X_2$ ) on Fmax.

Supplementary Figure S3. Effect of interaction between the two studied factors of O/S ratio ( $X_1$ ) and Aerosil % ( $X_2$ ) on Wad.
