# Supplementary material for: Development of Transdermal Oleogel Containing Olmesartan Medoxomil: Statistical Optimization and Pharmacological Evaluation
Source: Pharmaceutics. 2023 Mar 28;15(4):1083. doi: 10.3390/pharmaceutics15041083 (PMC10146305; doi:10.3390/pharmaceutics15041083)
Supplement: Supplementary file 1 [file pharmaceutics-15-01083-s001.zip]

Archive with 4 entries (4 files):
- Figures caption for supplementary figures.pdf
- Supplementary  Figure S1.tiff
- Supplementary  Figure S2.tiff
- Supplementary  Figure S3.tiff
